# Supplementary material
Source: MDPI journal article supplement (https://www.mdpi.com/2077-0472/10/10/431)
Supplement: s1 [file s1]

## Sheet: CNW4S
Days	CNW for F1 Season A 2017	CNW for F2 Season B 2017	CNW for F3Season A 2018	CNW for F4 Season B 2018
1	5.8	5.3	14.9	10.2
2	6.8	6.8	14.05	10.55
3	8.8	9.3	14.2	11.9
4	9.8	10.8	13.35	12.25
5	10.8	12.3	12.5	12.6
6	10.35	11.2	13.45	12.7
7	9.9	10.1	14.4	12.8
8	11	10.85	14.65	12.35
9	12.1	11.6	14.9	11.9
10	12.5	11.55	13.8	12.3
11	12.9	11.5	12.7	12.7
12	11.1	11.6	12.5	12.3
13	9.3	11.7	12.3	11.9
14	11.15	11.65	12.95	12.15
15	13	11.6	13.6	12.4
16	13.3	11.65	14.45	12.8
17	13.6	11.7	15.3	13.2
18	12.8	12.1	15	11.9
19	12	12.5	14.7	10.6
20	12.75	12.6	13.75	11.1
21	13.5	12.7	12.8	11.6
22	12.7	13.3	14.75	11.4
23	11.9	13.9	16.7	11.2
24	12.45	13.6	14.6	11.55
25	13	13.3	12.5	11.9
26	9.6	14.15	9.5	14.3
27	9.85	15	9.35	12.75
28	11.1	14.6	10.2	12.2
29	11.35	14.2	10.05	10.65
30	11.6	14.05	9.9	9.1
31	12	12.3	9.65	9.75
32	12.4	11.35	9.4	10.4
33	11	11.4	10.6	9.55
34	9.6	10.45	11.8	8.7
35	10.3	9.5	12.2	9
36	11	9.15	12.6	9.3
37	12.05	8.8	12.25	10.15
38	13.1	9.6	11.9	11
39	12.3	10.4	12.55	10
40	11.5	10.45	13.2	9
41	9.95	10.5	13.5	9.95
42	8.4	10.3	13.8	10.9
43	9	10.1	13.45	11
44	9.6	11.05	13.1	11.1
45	9.35	12	13.1	10.9
46	9.1	12.55	13.1	10.7
47	10.35	13.1	13.7	10.15
48	11.6	14.1	14.3	9.6
49	12.4	15.1	14.35	10.3
50	13.2	13.5	14.4	11
51	13.4	11.9	14.5	10.7
52	13.6	13.1	14.6	10.4
53	14.25	14.3	13.45	10.9
54	14.9	14.45	12.3	11.4
55	14.8	14.6	13.35	11.3
56	14.7	14.05	14.4	11.2
57	14.45	13.5	13.3	12.05
58	14.2	12.65	12.2	12.9
59	13.7	11.8	13.95	12.2
60	13.2	11.1	15.7	11.5
61	12.45	10.4	16.1	11.95
62	11.7	10.9	16.5	12.4
63	11.95	11.4	16.25	12.1
64	12.2	12.15	16	11.8
65	13.2	12.9	15.2	11.3
66	14.2	13.6	14.4	10.8
67	15	14.3	13.9	11.75
68	12.8	14.1	10.7	9.6
69	12.05	12.5	10.1	9.25
70	12.3	11.9	10.5	9.9
71	11.55	10.3	9.9	9.55
72	10.8	8.7	9.3	9.2
73	10.95	8.9	9.55	9.45
74	11.1	9.1	9.8	9.7
75	10.6	9.15	9.3	10.1
76	10.1	9.2	8.8	10.5
77	10.9	10.25	9.3	9.8
78	11.7	11.3	9.8	9.1
79	11.95	11.5	9.6	9.7
80	12.2	11.7	9.4	10.3
81	12.55	10.65	9.2	10.35
82	12.9	9.6	9	10.4
83	12.65	11.1	9.35	10.9
84	12.4	12.6	9.7	11.4
85	11.35	12.95	9.65	9.8
86	10.3	13.3	9.6	8.2
87	10.25	13	10.1	8.9
88	10.2	12.7	10.6	9.6
89	10.7	12.45	10.7	9.1
90	11.2	12.2	10.8	8.6
91	10.8	13.15	11.6	9.7
92	10.4	14.1	12.4	10.8
93	9	8.3	6.2	8.9
94	9.15	8.25	6.65	9.2
95	10.3	9.2	8.1	10.5
96	10.45	9.15	8.55	10.8
97	10.6	9.1	9	11.1
98	10.65	10.3	9.65	12
99	10.7	11.5	10.3	12.9
100	11.25	11.7	10.3	14.35
101	11.8	11.9	10.3	15.8
102	11.6	12.2	10.45	14.1
103	11.4	12.5	10.6	12.4
104	10.5	12.65	11.25	11.2
105	9.6	12.8	11.9	10
106	9.6	12.75	11.45	11
107	9.6	12.7	11	12
108	10.1	11	10.65	11.8
109	10.6	9.3	10.3	11.6
110	10.1	9.8	10	11.9
111	9.6	10.3	9.7	12.2
112	11	12.1	10.65	11.5
113	12.4	13.9	11.6	10.8
114	12.25	13.8	11.15	10.75
115	12.1	13.7	10.7	10.7
116	12.6	13.25	10.85	10.95
117	13.1	12.8	11	11.2
118	12.05	12.05	10.2	10.95
119	11	11.3	9.4	10.7
120	10.95	13.1	9.6	10.4
121	10.9	14.9	9.8	10.1
122	10.95	14.4	10.1	11.6
123	11	13.9	10.4	13.1
124	10.65	14.05	10.55	12.3
125	10.3	14.2	10.7	11.5
126	10.65	12.95	10.8	11.55
127	11	11.7	10.9	11.6
128	11.05	13.1	11.25	11.8
129	11.1	14.5	11.6	12
130	10.5	13.75	11.5	11.65
131	9.9	13	11.4	11.3
132	9.9	12.95	11.6	11.55
133	9.9	12.9	11.8	11.8
134	10	12.85	11.8	12.35
135	10.1	12.8	11.8	12.9
136	10.5	13.1	12.45	12.55
137	10.9	13.4	13.1	12.2
138	11.95	13	12.15	13.05
139	13	12.6	11.2	13.9
140	12.3	12.6	11.7	14.05
141	11.6	12.6	12.2	14.2
142	11.65	12.85	12.7	14.35
143	11.7	13.1	13.2	14.5

## Sheet: MCP
Days	Irrigated Water	Action
1	10.2	1
2	10.55	0
3	11.9	1
4	12.25	0
5	12.6	1
6	12.7	0
7	12.8	1
8	12.35	0
9	11.9	1
10	12.3	0
11	12.7	1
12	12.3	0
13	11.9	1
14	12.15	0
15	12.4	1
16	12.8	0
17	13.2	1
18	11.9	0
19	10.6	1
20	11.1	0
21	11.6	1
22	11.4	0
23	11.2	1
24	11.55	0
25	11.9	1
26	14.3	0
27	12.75	1
28	12.2	0
29	10.65	1
30	9.1	0
31	9.75	1
32	10.4	0
33	9.55	1
34	8.7	0
35	9	1
36	9.3	0
37	10.15	1
38	11	0
39	10	1
40	9	0
41	9.95	1
42	10.9	0
43	11	1
44	11.1	0
45	10.9	1
46	10.7	0
47	10.15	1
48	9.6	-1
49	10.3	1
50	11	0
51	10.7	1
52	10.4	0
53	10.9	1
54	11.4	0
55	11.3	1
56	11.2	0
57	12.05	1
58	12.9	0
59	12.2	1
60	11.5	0
61	11.95	1
62	12.4	0
63	12.1	1
64	11.8	0
65	11.3	1
66	10.8	0
67	11.75	1
68	9.6	0
69	9.25	1
70	9.9	0
71	9.55	1
72	9.2	0
73	9.45	1
74	9.7	0
75	10.1	1
76	10.5	0
77	9.8	1
78	9.1	0
79	9.7	1
80	10.3	0
81	10.35	1
82	10.4	0
83	10.9	1
84	11.4	0
85	9.8	1
86	8.2	0
87	8.9	1
88	9.6	0
89	9.1	1
90	8.6	0
91	9.7	1
92	10.8	0
93	8.9	1
94	9.2	0
95	10.5	1
96	10.8	0
97	11.1	1
98	12	0
99	12.9	1
100	14.35	0
101	15.8	1
102	14.1	0
103	12.4	1
104	11.2	0
105	10	1
106	11	0
107	12	1
108	11.8	0
109	11.6	1
110	11.9	1
111	12.2	0
112	11.5	1
113	10.8	0
114	10.75	1
115	10.7	0
116	10.95	1
117	11.2	1
118	10.95	0
119	10.7	1
120	10.4	0
121	10.1	1
122	11.6	0
123	13.1	0
124	12.3	1
125	11.5	0
126	11.55	1
127	11.6	0
128	11.8	1
129	12	0
130	11.65	1
131	11.3	0
132	11.55	1
133	11.8	0
134	12.35	1
135	12.9	0
136	12.55	1
137	12.2	0
138	13.05	1
139	13.9	0
140	14.05	1
141	14.2	0
142	14.35	1
143	14.5	1

## Sheet: SARSA
Days	CNW	Action
1	10.2	1
2	10.55	0
3	11.9	1
4	12.25	0
5	12.6	1
6	12.7	0
7	12.8	1
8	12.35	0
9	11.9	1
10	12.3	0
11	12.7	1
12	12.3	0
13	11.9	1
14	12.15	0
15	12.4	1
16	12.8	0
17	13.2	1
18	11.9	0
19	10.6	1
20	11.1	0
21	11.6	1
22	11.4	0
23	11.2	1
24	11.55	0
25	11.9	1
26	14.3	0
27	12.75	1
28	12.2	0
29	10.65	1
30	9.1	0
31	9.75	1
32	10.4	0
33	9.55	1
34	8.7	0
35	9	1
36	9.3	0
37	10.15	1
38	11	0
39	10	1
40	9	0
41	9.95	1
42	10.9	0
43	11	1
44	11.1	0
45	10.9	1
46	10.7	0
47	10.15	1
48	9.6	-1
49	10.3	1
50	11	0
51	10.7	1
52	10.4	0
53	10.9	1
54	11.4	0
55	11.3	1
56	11.2	0
57	12.05	1
58	12.9	0
59	12.2	1
60	11.5	0
61	11.95	1
62	12.4	0
63	12.1	1
64	11.8	0
65	11.3	1
66	10.8	0
67	11.75	1
68	9.6	0
69	9.25	1
70	9.9	0
71	9.55	1
72	9.2	0
73	9.45	1
74	9.7	0
75	10.1	1
76	10.5	0
77	9.8	1
78	9.1	0
79	9.7	1
80	10.3	0
81	10.35	1
82	10.4	0
83	10.9	1
84	11.4	0
85	9.8	1
86	8.2	0
87	8.9	1
88	9.6	0
89	9.1	1
90	8.6	0
91	9.7	1
92	10.8	0
93	8.9	1
94	9.2	0
95	10.5	1
96	10.8	0
97	11.1	1
98	12	0
99	12.9	1
100	14.35	0
101	15.8	1
102	14.1	0
103	12.4	1
104	11.2	0
105	10	1
106	11	0
107	12	1
108	11.8	0
109	11.6	1
110	8	0
111	11.15	0
112	10.7375	1
113	10.325	0
114	10.3	1
115	10.275	0
116	10.8125	1
117	11.2	1
118	10.95	0
119	10.7	1
120	10.4	0
121	10.1	1
122	11.6	0
123	13.1	0
124	12.3	1
125	11.5	0
126	11.55	1
127	11.6	0
128	11.8	1
129	12	0
130	11.65	1
131	11.3	0
132	11.55	1
133	11.8	0
134	12.35	1
135	12.9	0
136	12.55	1
137	12.2	0
138	13.05	1
139	13.9	0
140	14.05	1
141	14.2	0
142	14.35	1
143	14.5	1

## Sheet: Rice coefficient
Days	Kc
7	1.1
20	1.1
46	1.4
105	1.35
110	1.2
115	1
117	1
120	1
125	1
130	1
135	1
140	1

## Sheet: Field1
	SeasonA 2017
Days	Evap(ETO)	Rainfall
1	7.3	21.3
2	8.1	0
3	7.1	0
4	8.4	0
5	4.6	0
6	3.5	0
7	6.5	0
8	7.5	41.7
9	6.7	0
10	8.3	0
11	8.3	1.7
12	7.1	0
13	4.6	0
14	6.9	9.3
15	6	12.2
16	7.1	2.6
17	6.8	0
18	8.1	0
19	3.8	16.9
20	7	2.6
21	7.7	11.9
22	3.5	16.5
23	3.6	0.2
24	6.4	1.6
25	5.1	4.6
26	5.9	0
27	6.2	0
28	7.7	0
29	7.5	0
30	9.8	1.7
31	4.4	2.5
32	4.7	0
33	7.9	0
34	3.1	0
35	1.7	0
36	3.9	0
37	4.8	5.8
38	5.4	9.4
39	5.5	1.4
40	4.5	0
41	5.2	0
42	4.3	0
43	4.7	0
44	5.4	0
45	2.7	0
46	3.6	0
47	3.1	7.4
48	3.7	5.2
49	5.8	3.9
50	3.1	0
51	2.7	0
52	6.2	0.7
53	9.5	7.3
54	9.4	18.5
55	4.3	8
56	6.6	0
57	3.4	0
58	2.9	0
59	4.7	0
60	5.1	0
61	1.9	0
62	3.1	0.7
63	1.3	3.8
64	1.8	0
65	3.4	7.9
66	1.3	10.9
67	3.1	0.8
68	3.2	4.7
69	2.7	0
70	1.5	1.6
71	2.8	8.9
72	2.1	9.7
73	3	0.8
74	2.7	0
75	4.3	0
76	2.8	0
77	3.6	0
78	2.9	0
79	1.8	0
80	3.6	0
81	4.3	0
82	3.7	0
83	2.3	0
84	2.7	0
85	1.3	0
86	3	0
87	3.4	0
88	3.2	0
89	6.5	0
90	3.6	0
91	4.8	0
92	4.4	0
93	6.4	0
94	6.4	0
95	4	0
96	5	0
97	6.2	0
98	6.8	0
99	4.4	0
100	2.4	0
101	4.3	0
102	3.4	0
103	3.9	0
104	5.6	0
105	8.4	0
106	4.9	0
107	2.4	0
108	4.3	0
109	3.8	0
110	4.3	0
111	2.8	0
112	2.6	0
113	3	0
114	2.4	0
115	1.7	0
116	4.6	0
117	2.9	0
118	2.9	0
119	4.4	0
120	3.6	0
121	4.9	0
122	5.8	0
123	4.8	0
124	5	0
125	3.7	0
126	2.2	1.5
127	2.8	0
128	3.3	0
129	3.8	0
130	5.3	0
131	5.7	0
132	3.8	0
133	4.3	0
134	4.4	0
135	5.2	0
136	5.4	0
137	2	0
138	3.2	0
139	5	0
140	1.7	0
141	3.6	0
142	2.6	0
143	4.7	0

## Sheet: Field2
	SEASON B 2018
Days	Evap(ETO)	Rainfall
1	4.4	0
2	4.7	0
3	7.9	12.4
4	3.1	1.6
5	1.7	0
6	3.9	0.2
7	4.8	23.4
8	5.4	0
9	5.5	0
10	4.5	14.4
11	5.2	3
12	4.3	0
13	4.7	1
14	5.4	9.6
15	2.7	3.2
16	3.6	0
17	3.1	6
18	3.7	0
19	5.8	2
20	3.1	0
21	2.7	0
22	6.2	0
23	9.5	0
24	9.4	2.1
25	4.3	0.5
26	6.6	0
27	3.4	0
28	2.9	0
29	4.8	1.4
30	2.4	0
31	4.7	0
32	5.1	0
33	1.9	0
34	3.1	0
35	1.3	0
36	1.8	0
37	3.4	0
38	1.3	0
39	3.1	0
40	3.2	0
41	2.7	0
42	1.5	0
43	2.8	0
44	2.1	0
45	3	0
46	2.7	0
47	4.3	0
48	2.8	0
49	3.6	0
50	2.9	0
51	1.8	1
52	3.6	0
53	4.3	0
54	3.7	2.1
55	2.3	0
56	2.7	5.2
57	1.3	2.9
58	3	20.7
59	3.4	3.5
60	3.2	0.7
61	6.5	0
62	3.6	0
63	4.8	1.5
64	4.4	5.1
65	6.4	6.6
66	6.4	3.2
67	4	0
68	5	0.2
69	6.2	0
70	6.8	0
71	4.4	2.7
72	2.4	1.8
73	4.3	0
74	3.4	0.4
75	3.9	0.1
76	5.6	0
77	8.4	0
78	4.9	0
79	2.4	0
80	4.3	1.9
81	3.8	5.2
82	4.3	5.2
83	2.8	0.4
84	2.6	0
85	3	0
86	2.4	0.8
87	1.7	13.3
88	4.6	4.4
89	2.9	0
90	2.9	0
91	3.2	0
92	2.4	0
93	2.8	0
94	3.8	0
95	3	0
96	4.6	0
97	4.8	0
98	3.5	0
99	2.8	0
100	2	0
101	2.4	0
102	3.1	0
103	1.6	0
104	2.7	0
105	2.7	0
106	3.6	0
107	0.3	0
108	1.6	0
109	0.5	0
110	2.6	0
111	3.1	1.6
112	3.2	0.1
113	2.7	0
114	4.1	0
115	2.5	0
116	1.4	0
117	2.5	0
118	2.4	0
119	3.2	0
120	2.8	0
121	1.5	0
122	1.5	3.7
123	5.4	0.8
124	1.7	4.2
125	5.3	1.6
126	5.8	0
127	4.1	0
128	5.5	0
129	3.8	0
130	4.8	0
131	4.3	0
132	2.1	0
133	3.3	0
134	2.7	0.8
135	4.3	0
136	3.2	0.2
137	2.6	0
138	3.9	0
139	1.4	3.4
140	3.8	0.2
141	3.5	0.3
142	3.5	3.6
143	0.9	0

## Sheet: Field3
	SEASON A 2018
Days	Evap(ETO)	Rainfal
1	1.9	0
2	4.8	0.1
3	5.4	0
4	4.7	0
5	4.1	0
6	5.9	0
7	7.5	0
8	6.3	0
9	5.3	0
10	6.1	0
11	6.1	4.2
12	5.3	0.7
13	6.1	0.8
14	6.5	14.5
15	7	0
16	5	0
17	5.6	0
18	6.7	1.4
19	5.9	0
20	7.1	0
21	5.4	0
22	4.7	5.2
23	7.4	4.4
24	7.5	0
25	6	0
26	6.5	7.8
27	4.3	0
28	5.9	0
29	7.8	0
30	5.4	0
31	6.1	0
32	4.2	1.4
33	6.6	13.7
34	3.3	0
35	5	0
36	7.1	0
37	7	0
38	6.4	0
39	6.6	0
40	4.9	0.8
41	7.2	2.5
42	7.1	11.4
43	5.3	0.2
44	7.1	1.4
45	7.5	4.4
46	5.2	0.2
47	4.7	5.4
48	5.9	11.5
49	7.5	7.2
50	6.8	0
51	4.8	0
52	8.6	0
53	4.3	0
54	9	0
55	10	4.2
56	9.2	2.7
57	7.3	34.6
58	7.8	0
59	8	0
60	6.5	25.3
61	6.6	0
62	7.2	36
63	5.2	0.1
64	5	0.5
65	4.7	11.5
66	2.8	0
67	3.1	0.1
68	2.7	0.1
69	2.1	0
70	4.4	0.4
71	5.1	0.2
72	4.3	0.8
73	5.5	5.9
74	6	9.3
75	5.2	6.5
76	5.1	0
77	6.2	3.2
78	6.2	1.1
79	6.3	0
80	3.9	1
81	5.9	0.8
82	3.6	57.4
83	7	0.1
84	7.7	9.3
85	7.1	2.8
86	5.4	13.9
87	4.3	0
88	4.2	0
89	3.8	0
90	4.5	6.5
91	5.9	3.1
92	5	0
93	3.8	4.3
94	2.7	0
95	2.3	8.6
96	3.7	0
97	5.5	0
98	6.8	0
99	7.9	0.2
100	7.7	18.2
101	4.7	0.5
102	2.3	0
103	1.8	13.1
104	2.5	38.3
105	1.5	31.5
106	3.2	0
107	4.5	0
108	3.2	0
109	1	0
110	1.8	31.3
111	3	0.8
112	2.9	4.2
113	3.1	0
114	4.3	0
115	3.3	0
116	2.5	0
117	1.8	0
118	3.6	0
119	2.6	0
120	2.8	0
121	2.7	0
122	3.4	0
123	4	0
124	4.4	24.9
125	5.1	8.4
126	2.2	0
127	3.5	0
128	5.5	0
129	3.8	0
130	0.6	0
131	1.7	0
132	1.1	0
133	3.5	0
134	5	0
135	5.3	0
136	6.5	0
137	6.2	0
138	5.6	0
139	4.5	0
140	2.9	0
141	3.3	2.2
142	5.2	3.7
143	6.7	0

## Sheet: Field4
	Season B 2018
Days	Rainfall(mm)	Evaporation (mm)
1	0	4.4
2	13.5	4.7
3	0	7.9
4	1.6	3.1
5	4.6	1.7
6	3.5	3.9
7	0	4.8
8	0	5.4
9	0	5.5
10	0	4.5
11	0	5.2
12	0	4.3
13	0	4.7
14	0	5.4
15	1.3	2.7
16	0	3.6
17	0.4	3.1
18	0	3.7
19	0	5.8
20	0	3.1
21	0	2.7
22	0	6.2
23	0	9.5
24	0	9.4
25	0	4.3
26	0	6.6
27	0	3.4
28	20.7	2.9
29	0	4.8
30	0	2.4
31	3.3	4.7
32	0.3	5.1
33	4.1	1.9
34	12.7	3.1
35	0	1.3
36	9.2	1.8
37	1.2	3.4
38	1.9	1.3
39	0	3.1
40	0	3.2
41	0	2.7
42	0	1.5
43	8.3	2.8
44	2.5	2.1
45	5.3	3
46	1.1	2.7
47	0	4.3
48	37.2	2.8
49	0.3	3.6
50	1.4	2.9
51	0	1.8
52	0	3.6
53	11.4	4.3
54	0	3.7
55	0	2.3
56	0	2.7
57	0	1.3
58	0	3
59	0	3.4
60	0	3.2
61	0	6.5
62	5.1	3.6
63	7.5	4.8
64	8.9	4.4
65	0	6.4
66	2	6.4
67	1.6	4
68	0	5
69	0	6.2
70	5.3	6.8
71	10.4	4.4
72	0.6	2.4
73	5.2	4.3
74	1.2	3.4
75	0.7	3.9
76	0	5.6
77	0	8.4
78	6.8	4.9
79	13.8	2.4
80	4.6	4.3
81	0	3.8
82	1	4.3
83	0	2.8
84	0	2.6
85	0	3
86	1.5	2.4
87	7	1.7
88	0	4.6
89	0	2.9
90	0	2.9
91	0	3.2
92	0	2.4
93	0	2.8
94	0	3.8
95	0	3
96	0	4.6
97	0	4.8
98	0	3.5
99	0	2.8
100	0	2
101	0	2.4
102	0	3.1
103	0	1.6
104	0	2.7
105	0	2.7
106	0	3.6
107	0	0.3
108	0	1.6
109	0	0.5
110	0	2.6
111	0	3.1
112	0.2	3.2
113	0	2.7
114	0	4.1
115	0	2.5
116	0	1.4
117	0	2.5
118	0	2.4
119	0	3.2
120	0	2.8
121	22.4	1.7
122	0	3.6
123	0	2.6
124	0	4.7
125	0	5.4
126	0	1.7
127	0	5.3
128	0	5.8
129	6	4.1
130	0	5.5
131	0	3.8
132	2.9	4.8
133	0	4.3
134	0	2.1
135	1.2	3.3
136	0	2.7
137	0	4.3
138	0	3.2
139	0	2.6
140	0	3.9
141	3.7	1.4
142	10.5	3.8
143	0.5	4.3

## Sheet: evap
DAYS	AVARAGE EVAP
1	3.425
2	3.8
3	4.175
4	4.3
5	4.675
6	3.1
7	4.275
8	3.75
9	2.475
10	1.8
11	3.2
12	3.3
13	5.2
14	5.15
15	3.925
16	3.375
17	4.375
18	4.275
19	4.575
20	2.5
21	3.65
22	4.575
23	3.575
24	3.275
25	2.775
26	3.025
27	4.975
28	4.575
29	5.75
30	4.425
31	4.85
32	4.025
33	3.375
34	4.9
35	3.4
36	3.55
37	4.075
38	2.475
39	3.1
40	2.15
41	2.225
42	3.1
43	2.025
44	3.275
45	2.9
46	2.525
47	2.275
48	2.925
49	3.4
50	3.325
51	2.125
52	2.875
53	3.625
54	3.225
55	2.2
56	1.775
57	2.125
58	3.6
59	4.15
60	2.525
61	3.1
62	3.3
63	3.775
64	2.5
65	2.225
66	3.15
67	2.9
68	4.55
69	4.175
70	3.325
71	3.8
72	3.025
73	3.225
74	3.45
75	3.3
76	3.025
77	3
78	2.975
79	2.675
80	2.575
81	3.35
82	3.6
83	2.725
84	2.95
85	3.525
86	3.675
87	2.6
88	2.95
89	4.725
90	3.375
91	3.55
92	3
93	3.475
94	3.15
95	4.15
96	2.275
97	3.35
98	2.525
99	3.475
100	2.65
101	3.375
102	3.275
103	2.825
104	2.475
105	2.725
106	3.15
107	3.025
108	2.075
109	2.5
110	3.625
111	2.6
112	2.225
113	2.1
114	1.55
115	2.275
116	2.9
117	2.9
118	2.65
119	4.55
120	4.5
121	3.375
122	3.975
123	3.05
124	3.45
125	4.3
126	4.525
127	3.875
128	3.875
129	3.925
130	3.5
131	2.75
132	3.525
133	3.275
134	4.025
135	3.475
136	3.65
137	2.75
138	3.325
139	4.4
140	2.675
141	2.925
142	3.775
143	3.2
